# Supplementary material
Source: PubMed Central journal article supplement (PMC2781557)
Supplement: supp_M109.033076_jbc.M109.033076-1.pdf [file supp_M109.033076_jbc.M109.033076-1.pdf]

| Oligonucleotide | Sequence                                                                                             | Purpose                                    |
|-----------------|------------------------------------------------------------------------------------------------------|--------------------------------------------|
| SB 869          | 5' GGATATGATGATATGAAATAAAATGTGTTATAC<br>AGTTTGTGTTGACATTTTAAATGTGACATATTAAT<br>ATAATAACAACAAAAGAAGG  | <i>srI</i> promoter for<br>EMSA up         |
| SB 870          | 5' CCTTCTTTTGTGTTATTATATTAATATGTCAC<br>ATTTAAAATGTCAACAACAACTGTATAACACATTT<br>TATTCATATCATCATATCC    | <i>srI</i> promoter for<br>EMSA down       |
| SB 886          | 5' GGATGCACACACAAAAACAATAAATAGTATAG<br>ACTATTTGAAAATATATGTTATACTAATTCACAATT<br>AGCAAAACACAAAAACGGG   | <i>pckA</i> promoter for<br>EMSA up        |
| SB 887          | 5' CCCGTTTTTTGTGTTTTGCTAATTGTGAATTAG<br>TATAACATATATTTTCAAATAGTCTATACTATTTAT<br>TGTTTTTTGTGTGTGCATCC | <i>pckA</i> promoter for<br>EMSA down      |
| SB 894          | 5' GGTACTGGCGAATTTGTTTTAATGTGTTATACT<br>AATTTTAGATAGTAACAAATTAGGATGGCATAATTG<br>ATAAGGGGTGTCCAACATGG | <i>gapB</i> promoter for<br>EMSA up        |
| SB 895          | 5' CCATGTTGGACACCCCTTATCAATTATGCCATC<br>CTAATTTGTTACTATCTAAAATTAGTATAACACATT<br>AAAACAAATTCGCCAGTACC | <i>gapB</i> promoter for<br>EMSA down      |
| SB 1394         | 5' TTAATCAGATACTTAAATATCTGTAAACCCATT<br>ATATCGGGTTTTTGAGGGGATTTCAAGTCTTTAAGA<br>AGATACCAGGCAATCAATTA | <i>RNAIII</i> promoter<br>for EMSA up      |
| SB 1395         | 5' TAATTGATTGCCTGGTATCTTCTTAAAGACTTG<br>AAATCCCCTCAAAAACCCGATATAATGGGTTTACAG<br>ATATTTAAGTATCTGATTAA | <i>RNAIII</i> promoter<br>for EMSA down    |
| SB 342          | 5' CCCAGGAGAAATTATTACAG                                                                              | primer for <i>srI</i><br>template          |
| SB 423          | 5' TCGAGGATCCAACAAGGTGAATATGATGAT                                                                    | primer for <i>srI</i><br>template          |
| SB 1411         | 5' ATTTTAAATGTGACATATGCCGATAATAACAAC<br>AAAAGAAAT                                                    | primer for mutated<br><i>srI</i> template  |
| SB 1412         | 5' ATTTCTTTTGTGTTATTATCGGCATATGTCAC<br>ATTTAAAAT                                                     | primer for mutated<br><i>srI</i> template  |
| SB 1029         | 5' AGAGTATCCGCTCAATGAAA                                                                              | primer for <i>pckA</i><br>template         |
| SB 1030         | 5' CAATAAAAAATAAAAAGCATGCGGCTTTAAGCC<br>GCATGCTTTTTTTGTTGTGCGCGAACAGCAC                              | primer for <i>pckA</i><br>template         |
| SB 1413         | 5' CTATTTGAAAATATATGTGCCGCTAATTCACAA<br>TTAGCAAAA                                                    | primer for mutated<br><i>pckA</i> template |
| SB 1414         | 5' TTTTGCTAATTGTGAATTAGCGGCACATATATT<br>TTCAAATAG                                                    | primer for mutated<br><i>pckA</i> template |
| SB 1027         | 5' GAGGGCAGTCAGTGCGGAGC                                                                              | primer for <i>gapB</i><br>template         |
| SB 1028         | 5' CAATAAAAAATAAAAAGCATGCGGCTTTAAGCC<br>GCATGCTTTTTTTAGCCACAACCTCTTTGTCGT                            | primer for <i>gapB</i><br>template         |
| SB 1415         | 5' GAATTTGTTTTAATGTGTGCCGCTAATTTTAGA<br>TAGTAACAA                                                    | primer for mutated<br><i>gapB</i> template |
| SB 1416         | 5' TTGTTACTATCTAAAATTAGCGGCACACATTAA<br>AACAAATTC                                                    | primer for mutated<br><i>gapB</i> template |

Table S1: Oligonucleotides used in this study
